# Supplementary material for: Identification and Optimization of a Novel Taxanes Extraction Process from Taxus cuspidata Needles by High-Intensity Pulsed Electric Field
Source: MDPI journal article supplement (doi:10.3390/molecules27093010), 2022-05-07
Supplement: s1 [file s1]

# Identification and Optimization of a Novel Taxanes Extraction Process from *Taxus cuspidata* Needles by High-Intensity Pulsed Electric Field

Zirui Zhao, Yajing Zhang, Huiwen Meng, Wenlong Li and Shujie Wang \*

College of Biology and Agricultural Engineering, Jilin University, Changchun 130022, China; zzirui94@163.com (Z.Z.); yajing20@mails.jlu.edu.cn (Y.Z.); 13834838037@163.com (H.M.); liwl21@mails.jlu.edu.cn (W.L.)

\* Correspondence: wangsj12365@163.com

## Supplementary File

### Supplementary Table S1

**Table S1.** ANOVA and regression analysis of PBD for prediction of significant extraction variables.

| Source                                    | Sum of Squares | Degree of Freedom | Mean Square | F-Value      | p-Value | Inference    |
|-------------------------------------------|----------------|-------------------|-------------|--------------|---------|--------------|
| Model                                     | 24436.96       | 7                 | 3490.99     | 20.40        | 0.0056  | Significance |
| Residua                                   | 684.49         | 4                 | 171.12      |              |         |              |
| Cor total                                 | 25121.45       | 11                |             |              |         |              |
| $R^2 = 0.9728$ ; $\text{Radj}^2 = 0.9251$ |                |                   |             |              |         |              |
| Term                                      | Mean Square    | F-Value           | p-Value     |              |         |              |
| A                                         | 17105.28       | 99.96             | 0.0006      | Significance |         |              |
| B                                         | 15.46          | 0.090             | 0.7787      |              |         |              |
| C                                         | 94.30          | 0.55              | 0.4991      |              |         |              |
| D                                         | 5351.81        | 31.27             | 0.0050      | Significance |         |              |
| E                                         | 58.61          | 0.34              | 0.5898      |              |         |              |
| F                                         | 3.39           | 0.020             | 0.8948      |              |         |              |
| G                                         | 1808.11        | 10.57             | 0.0314      | Significance |         |              |

A: electric field strength (kV/cm), B: extraction times (time), C: solid-liquid ratio (g/mL), D: pulse number, E: centrifugal speed (r/min), F: flow rate (mL/min), G: particle size (mesh), TEF: taxanes equivalents of *Taxus cuspidate* ( $\mu\text{g/g}$ ),  $R^2$ : Coefficient of determination,  $\text{Radj}^2$ : adjusted determination coefficients.

### Supplementary Table S2

**Table S2.** ANOVA for response surface polynomial model.

| Source   | SUN of SQUARES | df | Mean Square | F Value | p-Value | Significant |
|----------|----------------|----|-------------|---------|---------|-------------|
| Model    | 171000         | 9  | 18998.49    | 45.87   | <0.0001 | ***         |
| $X_1$    | 59555.63       | 1  | 59555.63    | 143.81  | <0.0001 | ***         |
| $X_2$    | 18069.01       | 1  | 18069.01    | 43.63   | 0.0003  | ***         |
| $X_3$    | 5880.13        | 1  | 5880.13     | 14.20   | 0.0070  | **          |
| $X_1X_2$ | 5600.28        | 1  | 5600.28     | 13.52   | 0.0079  | **          |

|             |          |    |          |       |         |     |
|-------------|----------|----|----------|-------|---------|-----|
| $X_1X_3$    | 176.89   | 1  | 176.89   | 0.43  | 0.5343  |     |
| $X_2X_3$    | 11017.65 | 1  | 11017.65 | 26.60 | 0.0013  | **  |
| $X_1^2$     | 28108.93 | 1  | 28108.93 | 67.87 | <0.0001 | *** |
| $X_2^2$     | 11648.85 | 1  | 11648.85 | 28.13 | 0.0011  | **  |
| $X_3^2$     | 23782.84 | 1  | 23782.84 | 57.43 | 0.0001  | *** |
| Residual    | 2898.98  | 7  | 414.14   |       |         |     |
| Lack of Fit | 1542.38  | 3  | 514.13   | 1.52  | 0.3395  |     |
| Pure Error  | 1356.61  | 4  | 339.15   |       |         |     |
| Cor Total   | 173900   | 16 |          |       |         |     |

$R^2 = 0.9833$ ;  $R_{adj}^2 = 0.9619$ ;  $R_{pred}^2 = 0.8459$ ; Adeq Precision = 19.575

Level of significance: \*\*\*  $p < 0.001$ , \*\*  $p < 0.01$

$X_1$ : Electric field strength (kV/cm);  $X_2$ : Pulse number;  $X_3$ : Particle size (mesh).

### Supplementary Table S3

**Table S3.** Virtual samples.

|   | Electric Field Strength (kV/cm) | Pulse Number | Particle Size (Mesh) |
|---|---------------------------------|--------------|----------------------|
| 1 | 15.03                           | 10.02        | 120.24               |
| 2 | 15.03                           | 10.02        | 119.76               |
| 3 | 15.03                           | 9.98         | 120.24               |
| 4 | 15.03                           | 9.98         | 119.76               |
| 5 | 14.97                           | 10.02        | 120.24               |
| 6 | 14.97                           | 10.02        | 119.76               |
| 7 | 14.97                           | 9.98         | 120.24               |
| 8 | 14.97                           | 9.98         | 119.76               |

Supplementary Figure S1

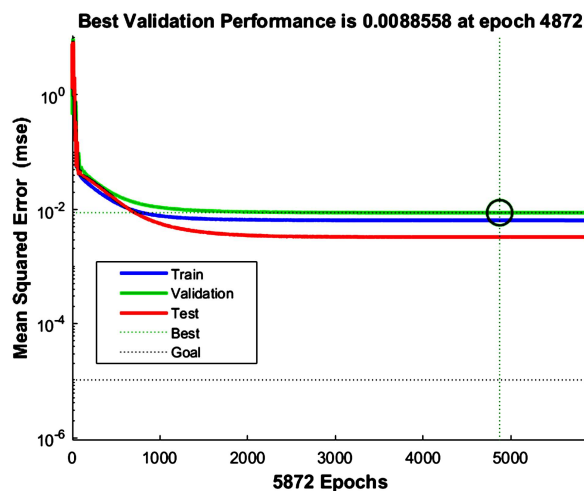

Figure S1. The performance of the ANN model.

Supplementary Figure S2

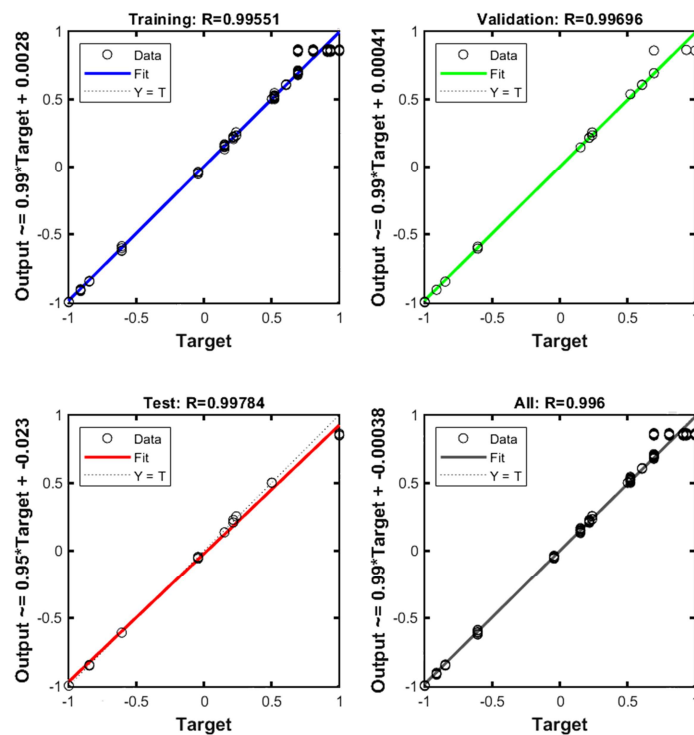

Figure S2. Regression plot of the ANN model for training, testing, validation, and all data sets.

# Supplementary Table S4

**Table S4.** Evaluation of the predictive capacities of RSM and GA-BP modeling systems.

|                      | RSM     | GA-BP   |
|----------------------|---------|---------|
| <b>R<sup>2</sup></b> | 0.9833  | 0.9921  |
| <b>RMSE</b>          | 13.0301 | 8.943   |
| <b>MAPE</b>          | 2.10837 | 0.70595 |
| <b>SEP</b>           | 0.02353 | 0.01621 |

RMSE: root mean square error, MAPE: mean absolute percent error, R<sup>2</sup>: coefficient of determination, SEP: standard error of prediction, RSM: response surface methodology, GA-BP: back-propagation neural network conjugated with genetic algorithm.

# Supplementary Figure S3

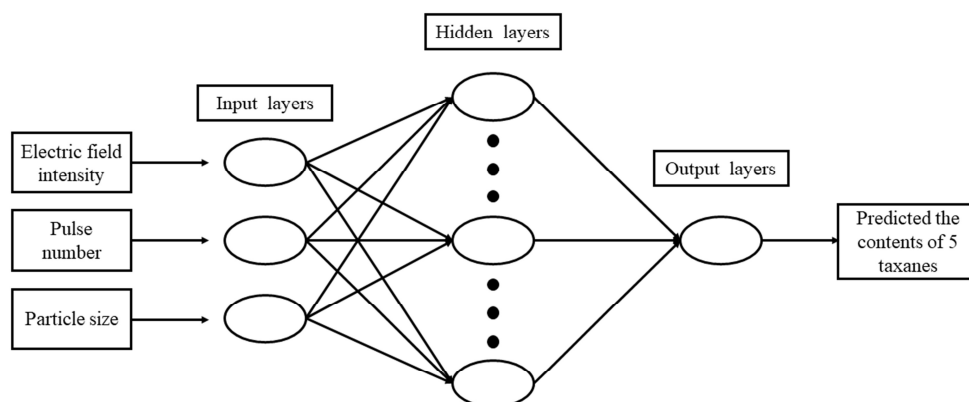

**Figure S3.** ANN structure of PEF extraction of five main taxanes from *Taxus cuspidate*.
